# Supplementary material
Source: PubMed Central journal article supplement (PMC6702105)
Supplement: NIHMS1529700-supplement-1.pdf [file NIHMS1529700-supplement-1.pdf]

**Appendix**  
**Skin Tone Matters: Racial Microaggressions and Delayed Prenatal Care**  
**Slaughter-Acey et al.**

**Appendix Table 1.** Distribution of Maternal Characteristics in the LIFE Study, Overall and Stratified by Maternal Skin Tone (N=1,209), Metropolitan Detroit, Michigan, 2009–2011

| Characteristic                          | Total sample (N=1,209) | Self-reported maternal skin tone |                |               | p-value |
|-----------------------------------------|------------------------|----------------------------------|----------------|---------------|---------|
|                                         |                        | Dark (n=251)                     | Medium (n=574) | Light (n=384) |         |
| Maternal age, years                     |                        |                                  |                |               | 0.08    |
| Mean, SD                                | 27.2, 6.2              | 27.8, 6.3                        | 27.4, 6.1      | 26.6, 6.1     | 0.03    |
| 18–19                                   | 8.4                    | 6.4                              | 7.5            | 11.2          |         |
| 20–29                                   | 57.7                   | 54.6                             | 57.7           | 59.9          |         |
| 30–34                                   | 19.2                   | 21.9                             | 20.2           | 15.9          |         |
| ≥35                                     | 14.6                   | 17.1                             | 14.6           | 13.0          |         |
| Current city of residence               |                        |                                  |                |               | 0.20    |
| City of Detroit                         | 48.8                   | 52.2                             | 49.7           | 45.3          |         |
| Outer Metro Detroit                     | 51.2                   | 47.8                             | 50.4           | 54.7          |         |
| Employment status                       |                        |                                  |                |               | 0.12    |
| Yes                                     | 49.4                   | 51.8                             | 51.2           | 45.1          |         |
| No                                      | 50.6                   | 48.2                             | 48.8           | 55.0          |         |
| Educational attainment                  |                        |                                  |                |               |         |
| Mean, SD (years)                        | 13.7, 1.9              | 13.7, 1.8                        | 13.7, 1.9      | 13.7, 1.9     | 0.80    |
| ≤High school/GED                        | 16.9                   | 15.1                             | 17.4           | 17.2          | 0.94    |
| Some college                            | 70.0                   | 71.3                             | 69.9           | 69.7          |         |
| ≥Associates degree                      | 13.2                   | 13.6                             | 12.7           | 13.5          |         |
| Marital status                          |                        |                                  |                |               | 0.92    |
| Single                                  | 54.1                   | 55.0                             | 54.2           | 53.4          |         |
| Married/living with partner             | 45.9                   | 45.0                             | 45.8           | 46.6          |         |
| Health insurance                        |                        |                                  |                |               | 0.32    |
| Private                                 | 39.2                   | 43.0                             | 37.5           | 39.3          |         |
| Public                                  | 60.8                   | 57.0                             | 62.5           | 60.7          |         |
| Receipt of WIC/food stamps              |                        |                                  |                |               | 0.31    |
| Yes                                     | 52.8                   | 57.0                             | 52.1           | 51.0          |         |
| No                                      | 47.2                   | 43.0                             | 47.9           | 48.9          |         |
| Parity (number of previous live births) |                        |                                  |                |               | 0.53    |
| None                                    | 43.2                   | 41.0                             | 42.2           | 41.0          |         |
| 1                                       | 30.4                   | 31.1                             | 30.0           | 31.1          |         |
| ≥2                                      | 26.5                   | 27.9                             | 27.9           | 27.9          |         |
| History of chronic medical conditions   |                        |                                  |                |               | 0.32    |
| Yes                                     | 30.0                   | 32.3                             | 30.7           | 27.3          |         |
| No                                      | 70.0                   | 67.3                             | 69.3           | 72.7          |         |
| Racial microaggressions (DLE-B)         |                        |                                  |                |               | 0.43    |
| Mean, SD                                | 96.1, 79.8             | 100.6, 83.4                      | 92.0, 75.8     | 99.3, 82.9    | 0.23    |
| <Median (score 39–70)                   | 49.7                   | 47.0                             | 52.6           | 48.7          |         |
| ≥Median (score 71–637)                  | 50.3                   | 53.0                             | 48.4           | 51.3          |         |

LIFE, Life-course Influences of Fetal Environments; DLE-B, Daily Life Experiences of Racial Discrimination and Bother Scale; PNC, prenatal care; WIC, Special Supplemental Nutrition Program for Women, Infants, and Children.

**Appendix**  
**Skin Tone Matters: Racial Microaggressions and Delayed Prenatal Care**  
**Slaughter-Acey et al.**

**Appendix Table 2.** Unadjusted ORs and AORs for the Relationship Between Racial Microaggressions (DLE-B score >71) and Prenatal Care Initiation Overall and Stratified by Maternal Skin Tone, LIFE Study, Metropolitan Detroit (2009–2011)

| Variable                 | PNC initiation 4–6 months<br>(ref: <3 months) |                           | PNC initiation ≥7 months or no PNC<br>(ref: <3 months) |                           | Interaction<br><i>p</i> -value |
|--------------------------|-----------------------------------------------|---------------------------|--------------------------------------------------------|---------------------------|--------------------------------|
|                          | OR (95% CI)                                   | AOR <sup>a</sup> (95% CI) | OR (95% CI)                                            | AOR <sup>a</sup> (95% CI) |                                |
| Overall sample (N=1,209) | 1.08 (0.82, 1.41)                             | 1.16 (0.88, 1.53)         | 1.27 (0.96, 1.68)                                      | <b>1.39 (1.04, 1.86)</b>  |                                |
| Maternal skin tone       |                                               |                           |                                                        |                           | 0.06                           |
| Light brown (n=384)      | 1.38 (0.85, 2.26)                             | 1.50 (0.90, 2.50)         | <b>1.81 (1.10, 2.97)</b>                               | <b>1.90 (1.14, 3.17)</b>  |                                |
| Medium brown (n=574)     | 1.08 (0.74, 1.61)                             | 1.16 (0.78, 1.72)         | 0.89 (0.59, 1.34)                                      | 0.94 (0.61, 1.43)         |                                |
| Dark brown (n=251)       | 0.72 (0.40, 1.32)                             | 0.79 (0.41, 1.53)         | 1.67 (0.89, 3.14)                                      | <b>2.15 (1.07, 4.32)</b>  |                                |

*Note:* Boldface indicates statistical significance ( $p < 0.05$ ).

<sup>a</sup>Multinomial logistic regression model adjusted for maternal age, city of residence, grade level, health insurance, parity, employment, and receipt of Special Supplemental Nutrition Program for Women, Infants, and Children (WIC) or food stamps.

LIFE, Life-course Influences of Fetal Environments; DLE-B, Daily Life Experiences of Racial Discrimination and Bother Scale; PNC, prenatal care.

**Appendix**  
**Skin Tone Matters: Racial Microaggressions and Delayed Prenatal Care**  
**Slaughter-Acey et al.**

**Appendix Table 3.** Unadjusted ORs and AORs for No/Late PNC in Relation to the DLE-B Overall and Subscales, LIFE Study (N=1,209), Metropolitan Detroit, Michigan (2009–2011)

| DLE-B               | Overall sample<br>(N=1,209) |                                    | Light brown<br>(n=384)             |                                    | Medium brown<br>(n=574) |                      | Dark brown<br>(n=251)              |                                    |
|---------------------|-----------------------------|------------------------------------|------------------------------------|------------------------------------|-------------------------|----------------------|------------------------------------|------------------------------------|
|                     | OR<br>(95% CI)              | AOR<br>(95% CI)                    | OR<br>(95% CI)                     | AOR<br>(95% CI)                    | OR<br>(95% CI)          | AOR<br>(95% CI)      | OR<br>(95% CI)                     | AOR<br>(95% CI)                    |
| Overall scale       | 1.24<br>(0.95, 1.72)        | <b>1.31</b><br><b>(1.00, 1.72)</b> | <b>1.62</b><br><b>(1.02, 2.59)</b> | <b>1.65</b><br><b>(1.02, 2.65)</b> | 0.87<br>(0.59, 1.27)    | 0.88<br>(0.60, 1.32) | <b>1.88</b><br><b>(1.04, 3.40)</b> | <b>2.29</b><br><b>(1.19, 4.41)</b> |
| Occurrence subscale | 1.15<br>(0.89, 1.50)        | 1.21<br>(0.93, 1.68)               | <b>1.60</b><br><b>(1.00, 2.55)</b> | <b>1.70</b><br><b>(1.05, 2.73)</b> | 0.72<br>(0.49, 1.06)    | 0.71<br>(0.48, 1.06) | <b>2.03</b><br><b>(1.13, 3.66)</b> | <b>2.47</b><br><b>(1.29, 4.71)</b> |
| Bothered subscale   | 1.27<br>(0.98, 1.65)        | <b>1.39</b><br><b>(1.06, 1.82)</b> | <b>1.64</b><br><b>(1.03, 2.68)</b> | <b>1.76</b><br><b>(1.09, 2.84)</b> | 0.91<br>(0.62, 1.33)    | 0.95<br>(0.64, 1.41) | <b>1.88</b><br><b>(1.03, 3.40)</b> | <b>2.47</b><br><b>(1.28, 4.80)</b> |

Notes: Boldface indicates statistical significance ( $p < 0.05$ ).

<sup>a</sup>Binary logistic regression model adjusted for maternal age, city of residence, grade level, health insurance, parity, employment, and receipt of Special Supplemental Nutrition Program for Women, Infants, and Children (WIC) or food stamps.

LIFE, Life-course Influences of Fetal Environments; DLE-B, Daily Life Experiences of Racial Discrimination and Bother Scale; PNC, prenatal care.
